# Supplementary material
Source: PubMed Central journal article supplement (PMC3629770)
Supplement: EC.00275-12_zek999094066so1.pdf [file EC.00275-12_zek999094066so1.pdf]

## Supplementary information

### Plasmid construction.

pESA1-KO for knocking out of *ESA1*, two PCR fragments, 0.53 kb containing the *ESA1* 5' region (primers F2 and R2) and 0.6 kb containing the *ESA1* 3' region (primers F3 and R3) were digested and inserted into pCUB6 at BglIII and BamHI-SphI sites, respectively. pSAS2-KO for knocking out of *SAS2*, two PCR fragments, 0.55 kb containing the *SAS2* 5' region (primers F17 and R17) and 0.5 kb containing the *SAS2* 3' region (primers F18 and R18) were digested and inserted into pCUB6 at BglIII and BamHI-SphI sites, respectively.

pCPC39, which contains a tet-on promoter and a *URA3* marker, *URA3* was constructed as follows: fragment A of *ADH1p-cartTA-GAL4AD* was amplified by PCR from pCaUME6-3 (3), which was originated from pNIM1 (2) with the primers TOF1 and TOR1. Fragment B of ACT1-terminator was amplified from genomic DNA of SC5314 with the primers TOF2 and TOR2. Fragment C1 of selective marker, *URA3*, was amplified by PCR from genomic DNA of SC5314 with the primers TOF3 and TOR3. Fragment D of tet-OP4 promoter was amplified from pCaUME6-3 (2) with the primers TOF4 and TOR4. The plasmid backbone E which contains the AmpR gene and pBR322 origin was amplified by PCR from pUC18 with the primers TOF5 and TOR5. Fragments A, B, D and E were assembled with C with the Cloneget Kit which applied in fusion strategy (4) to produce pCPC39 (Willget, Shanghai, China).

pCPC42, which contains a tet-off promoter and *URA3* marker, was constructed as follows: Fragment of a *C. albicans*-adapted catTA-Advance element was synthesized and amplified by the primers TOF6 and TOR6. The plasmid backbone was amplified from pCPC39 with the primers TOF7 and TOR7. The catTA-Advance fragment was assembled with backbones of pCPC39 with the Cloneget Kit (Willget, Shanghai, China) to produce pCPC42.

pCPC98 (pPtet-ESA1) for doxycycline controlled *C. albicans* *ESA1* expression was constructed as follows: The plasmid backbone fragment G which contains the Amp<sup>R</sup> gene and pBR322 origin was amplified by PCR from pUC18 with the primers TOF9 and TOR9. Fragment F containing -521 bp to +1979 bp of the *ESA1* was amplified from SC5314 with primers TOF8 and TOR8. The PCR products above were infused with the ClonEset Kit (Willgen, Shanghai, China) to produce plasmid pCPC97. Primers TOF10 and TOR10 were used to amplify backbone fragment H from pCPC97, primers TOF11 and TOR11 to amplify fragment I (*URA3-Ptet*) from pCPC42, infusing these two fragments (H and I) to produce pCPC98 (pPtet-ESA1). A fragment containing *URA3-Ptet* flanked with *ESA1* 5' region and coding region was amplified from pCPC98 (pPtet-ESA1) using primers TOF12 and TOR12 integrated into *ESA1* locus to construct strains for doxycycline controlled *ESA1* gene expression (1, 4).

pBA1-WX1 (pBA1-ESA1) for the ectopic expression of *C. albicans* *ESA1* under *ADHI* promoter was constructed by inserting a 1.6 kb PCR fragment (primers F4 and R4) containing *CaESA1* coding sequence into the BglIII-ClaI site of plasmid pBA1. The same strategy was used for construction of pBA1-WX2 to pBA1-WX10. A 1.2 kb PCR fragment (primers F5 and R4) of *CaESA1* deleting the chromo domain (CHD), 0.9 kb fragment (primers F4 and R6) of *CaESA1* deleting the MYST domain and 1.3 kb fragment (primers F7 and R7) of *CaESA1* deleting an insertion fragment were inserted into the BglIII-ClaI site of pBA1. Primers F8 and R8 were used to amplify the full-length coding sequence of *S. cerevisiae* *ESA1* (*ScESA1*). Primers F9 and R9, F10 and R10 were used in construction of site-directed mutagenesis of ScEsal G315E and ScEsal L327S. Primers F11 and R11 were used to amplify the full-length human TIP60 isoform2 cDNA. Primers F12 and R12, F13 and R13 were used to construct hybrid fragments of TIP60 MYST+*Caesa1* CHD and TIP60 CHD+*Caesa1* MYST, respectively. All PCR fragments were inserted into the BglIII-EcoRV site of pBA1 for the ectopic expression in *C. albicans* under control of *ADHI* promoter.

**Table S1. Primers used in this study**

| Primers | Sequence                                                                               | Purpose and features            |
|---------|----------------------------------------------------------------------------------------|---------------------------------|
| F1      | 5'-ACTGTCCATCAATCAATCAAAAACGAAAAAGACAATAACACCGAC<br>AACAAGTAATACATC Gtttccagtcacgacgtt | KO <i>ESA1</i><br>by PCR method |
| R1      | 5'-TCTGGTTTAAGATTATTGACATGCCATGGCGATAAAAGTATTAGAAT<br>ATGGGGAACATCtgtggaattgtgagcggata |                                 |
| F2      | 5'-tgca agatct ctgcag GAAATGCTTTTGTGCAGTGAAC                                           | pESA1-KO-5' region              |
| R2      | 5'-tgca agatct GATGTATTACTTGTTGTCTGGTG                                                 |                                 |
| F3      | 5'-cgat gcatcc GATGTTCCCCATATTCTAATAC                                                  | pESA1-KO-3' region              |
| R3      | 5'-cgat gcatgc ctgcag CTGATTATAACGATCCACAGGT                                           |                                 |
| F4      | 5'-gac agatct ATGGCGGTAGCAGAAATCAAA                                                    | pBA1-WX1                        |
| R4      | 5'-gac atcgat TTACCACCCAAACCGTAATTG                                                    | (pBA1-ESA1)                     |
| F5      | 5'-gac agatct ATGAACTGAAAAAGAAGAGCAAATC                                                | pBA1-WX2                        |
| R4      | 5'-gac atcgat TTACCACCCAAACCGTAATTG                                                    | (pBA1-caesa1 d CHD)             |
| F4      | 5'-gac agatct ATGGCGGTAGCAGAAATCAAA                                                    | pBA1-WX3                        |
| R6      | 5'-gac atcgat CTAATTTTCCTTTGTGTCTGCTT                                                  | (pBA1-caesa1 d MYST)            |
| F7      | 5'-AATGGTAATTTCTCTTTCTACCAATAGCTTTA                                                    | pBA1-WX4                        |
| R7      | 5'-TTGGTAGAAAGAGAAATTACCATTGAGGACATT                                                   | (pBA1-caesa1 d Ins)             |
| F8      | 5'-gac agatct ATGTCCCATGACGGAAGAAG                                                     | pBA1-WX5                        |
| R8      | 5'-gac gatc TTACCAGGCAAAGCGTAAGTGA                                                     | (pBA1-ScESA1)                   |
| F9      | 5'-CAATACCAAAGGATGGaATATGGTAAGTTATTGA                                                  | pBA1-WX6                        |
| R9      | 5'-TCAATAACTTACCATATCCATCCTTTGGTATTG                                                   | (pBA1-scesa1 G315E)             |
| F10     | 5'-GAATTTTCGTATGAATcGTGCAAAAAGGAAAACA                                                  | pBA1-WX7                        |
| R10     | 5'-TGTTTTCTTTTCGACgATTCATACGAAAATTC                                                    | (pBA1-scesa1 L327S)             |
| F11     | 5'-gac agatct ATGGCGGGAGGTGGGGAGATA                                                    | pBA1-WX8                        |
| R11     | 5'-gac gatc TCACCACTTTCCTCTCTTGCTCCA                                                   | (pBA1-hTIP60)                   |
| F12     | 5'-gtgccagcgagacagcccaAACTGAAAAAGAAGAGCAA                                              | pBA1-WX9                        |
| R12     | 5'-TTTGCTCTTCTTTTCAGTTTtggggctgtctcgctgggcac                                           | (pBA1-TIP60MYST<br>+caesa1 CHD) |
| F13     | 5'-AAAGCAGACACAAAGGAAAATgcctcggtttccctcagaat                                           | pBA1-WX10                       |
| R13     | 5'-attctgaggaaaaccgaggcATTTTCCTTTGTGTCTGCTTT                                           | (pBA1-TIP60CHD<br>+caesa1 MYST) |
| F14     | 5'-GCCAACATATCCATAGTTAAcGCTTTTTCCATATTTTGT                                             | Hind mutation in <i>AGR4</i>    |
| R14     | 5'-AAACAAAATAGGAAAAAGCgTAACTATGGATATGTTGGC                                             | in p671                         |
| F15     | 5'-gac aagctt GTTTTCCCAGTCACGACGTT                                                     | <i>HIS1</i> to <i>AGR4</i>      |
| R15     | 5'-gac aagctt TGTGGAATTGTGAGCGGATA                                                     | substitution in p671            |
| F16     | 5'-ACATTAGCTTCGAAAACACTAAGTTTTGTCTTACTTCGGGTATAAA<br>GCCACTAAATTCTgtttccagtcacgacgtt   | KO <i>SAS2</i><br>by PCR method |
| R16     | 5'-TCAAGTGAATGTGGAAGAAAACAACTAGCTAGTGGTGGCAACG<br>ATAATAATTTGTTTgtggaattgtgagcggata    |                                 |
| F17     | 5'-tgca agatct ctgcag CTCTTTCTAATGCTGCCAACAT                                           | pSAS2-KO-5' region              |
| R17     | 5'-tgca agatct GATATTAGATGTAGAAATTAAC                                                  |                                 |
| F18     | 5'-cgat gcatcc TGCTCCTAACAAAACCGAAGCA                                                  | pSAS2- KO-3' region             |
| R18     | 5'-cgat gcatgc ctgcag CAACTAGCTAGTGGTGGCAAC                                            |                                 |
| TOF1    | 5'- ACAGTCTGCCAGACTGCCAGCGAGAAAGAGGAGTAT                                               |                                 |
| TOR1    | 5'- GTAGCGATGCACGGTTTACTCTTTTTTTGGGTTTGGTGG                                            |                                 |
| TOF2    | 5'- ACCGTGCATCGCTACCATTGTTACCACAAATGTTTCT                                              |                                 |

|       |                                                                    |                                                            |
|-------|--------------------------------------------------------------------|------------------------------------------------------------|
| TOR2  | 5'- AGTCTGGCAGACTGTAGATATAGAAATGCCTTGGG                            |                                                            |
| TOF3  | 5'- ACAGTCTGCCAGACTCAAAACCGGATCTTCAGAAC                            | Fragment A to E<br>for pCPC39<br>construction              |
| TOR3  | 5'- CTGACTGACTGACTGCTACTATCCCAGCTACTTCG                            |                                                            |
| TOF4  | 5'- CAGTCAGTCAGTCAGGCTTGGACAGCATCAGCAGTAG                          |                                                            |
| TOR4  | 5'- TATGACCATGATTACCTATTTATATTTGTATGTGTGTAGGAGT                    |                                                            |
| TOF5  | 5'- gtaatcatggtcata<br>CCGCGGAGGCCTGGGCCCCGATAACGCAGGAAAGAACAT     |                                                            |
| TOR5  | 5'-AGTCTGGCAGACTGTCTTAAGGGATCCAAGCTTCCCGGGTTCTTAG<br>ACGTCAGGTGGCA |                                                            |
| TOF6  | 5'-<br>AATACAAAAACAATTATGTCAAGATTAGATAAATCAAAAGTTATTAAT            | carfTA-advance fragment<br>for pCPC42 construction         |
| TOR6  | 5'- ACCAAACAAAGTCGAACACCTGATTACATTTTAATTGT                         |                                                            |
| TOF7  | 5'- TCGACTTTGTTTGGTGGCGCCAATTTTAATCAAAGT                           | pCPC39 fragment<br>for pCPC42 construction                 |
| TOR7  | 5'- AATTGTTTTTGTATTTGTTGTTGTTGTTGTATGACAAT                         |                                                            |
| TOF8  | 5'- ACAGTCTGCCAGACTGAACGTTTGCGGTATGACCT                            |                                                            |
| TOR8  | 5'- CTGACTGACTGACTGAACGGCGAAATAAAGCAATG                            |                                                            |
| TOF9  | 5'-CAGTCAGTCAGTCAGGATAACGCAGGAAAGAACAT                             |                                                            |
| TOR9  | 5'-TCTAGAGTCGACCTGGGGCCCAGGCCTCCGCGGCTCGAGTTCTTAG<br>ACGTCAGGTGGCA | Fragment F to I<br>for pCPC98<br>construction              |
| TOF10 | 5'- AACGTTTCGTGGACGTTGTCTCAACTGGCGAAATG                            |                                                            |
| TOR10 | 5'- AGGTAATCATTGTCAATGGCGGTAGCAGAAATCAA                            |                                                            |
| TOF11 | 5'- CGTCCACGAAACGTTGAGAAAGAGGAGTATTGGCATTG                         |                                                            |
| TOR11 | 5'- TGACAATGATTACCTATTTATATTTGTATGTGTGTAGGAGT                      |                                                            |
| TOF12 | 5'-GGGAATCACAAAACCTCCTGAA                                          | <i>Ptet-ESAI</i> insertion                                 |
| TOR12 | 5'-TGTGGGGTACCGGTTGTACT                                            |                                                            |
| CF1   | 5'-GACAGTTGCTAGTTGAAAAGA                                           | verify deletion of first<br>copy <i>ESAI</i> at 5' region  |
| CR1   | 5'-ttctcaattcgtccattaca                                            |                                                            |
| CF2   | 5'-gatctacttcaatttgactca                                           | verify deletion of first<br>copy <i>ESAI</i> at 3' region  |
| CR2   | 5'-GATGCTGGGATTTGGAAAGAA                                           |                                                            |
| CF3   | 5'-GATCTCCGTTTTATAAGGGAA                                           | verify deletion of second<br>copy <i>ESAI</i> at 5' region |
| CR3   | 5'- gacttcgacagaaccatttaa                                          |                                                            |
| CF4   | 5'- gttaagcgatgattcagag                                            | verify deletion of second<br>copy <i>ESAI</i> at 3' region |
| CR4   | 5'- GGTGGGAAAGACTGTGTCGTA                                          |                                                            |
| CF5   | 5'-ATGGCGGTAGCAGAAATCAA                                            | amplify <i>ESAI</i> ORF                                    |
| CR5   | 5'-TTACCACCCAAACCGTAATT                                            |                                                            |
| CF6   | 5'-GTACTATTTTCTTCATCGTCT                                           | verify deletion of first<br>copy <i>SAS2</i> at 5' region  |
| CR5   | 5'-gatatcagctgcaggcaagaa                                           |                                                            |
| CF7   | 5'-gtacattacttttgctataca                                           | verify deletion of first<br>copy <i>SAS2</i> at 3' region  |
| CR7   | 5'-GGTACCCATTTGGCAATAGGA                                           |                                                            |
| CF8   | 5'-GCAACATTAGCTTCGAAAACA                                           | verify deletion of second<br>copy <i>SAS2</i> at 5' region |
| CR8   | 5'- gacttcgacagaaccatttaa                                          |                                                            |
| CF9   | 5'- gttaagcgatgattcagag                                            | verify deletion of second<br>copy <i>SAS2</i> at 3' region |
| CR9   | 5'-GAATTGAAGATCACTTTGTTA                                           |                                                            |
| CF10  | 5'-GAAATATCAATAAAGTCACA                                            | amplify <i>SAS2</i> ORF                                    |
| CR10  | 5'-TCATAGTATTAAACATTCTG                                            |                                                            |

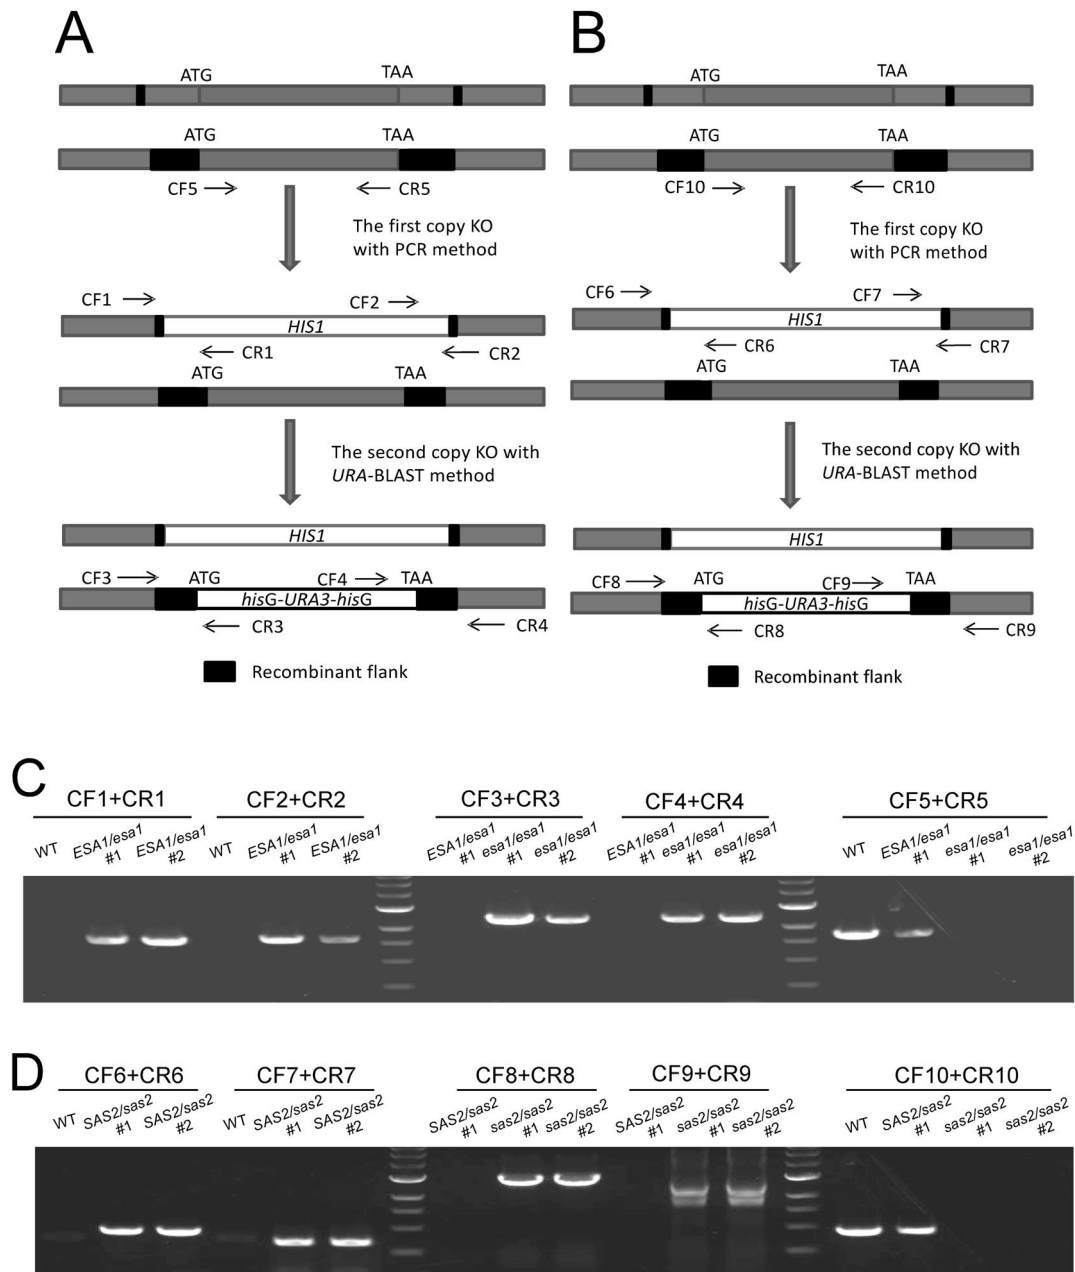

**Figure S1. Disruption of the *C. albicans* *ESA1* and *SAS2* genes.** (A) Strategy for disruption of *ESA1* and verification of *esa1* mutants. (B) Strategy for disruption of *SAS2* and verification of *sas2* mutants. PCR analysis of *ESA1* deletion (C) and *SAS2* deletion (D) constructs. Genomic DNA from the recipient strain WT (BWP17), *ESA1* deletion or *SAS2* deletion mutants was amplified with primers indicated in Supplementary Table S1 for verification.

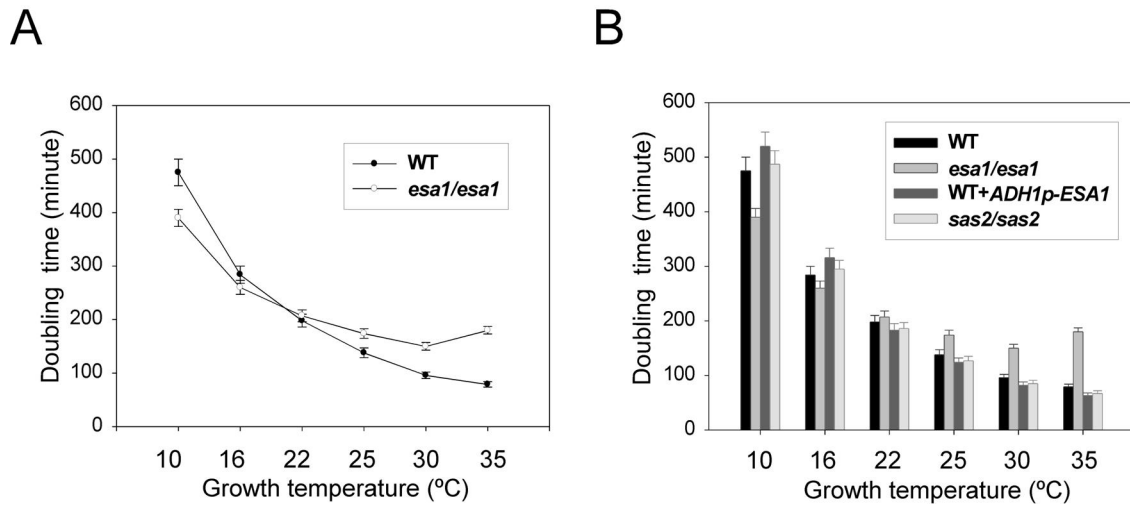

**Figure S2.** Sas2 and Esa1 have opposite effects on cell growth. (A) Doubling time of wild type and *esa1/esa1* mutant at different temperatures. The doubling time in minutes were drawn by sigmaplot10 data statistical analysis. (B) Doubling time of wild type (BWP17+ pBA1), wild type+ *ADH1p-ESA1* (BWP17+ pBA1-*ESA1*), *esa1/esa1* (CWX3+ pBA1) and *sas2/sas2* (CWX6+ pBA1). Overnight cultures were re-inoculated into fresh liquid YPD and grown at different temperatures, OD<sub>600</sub> values were measured during log phase at various time points (every 0.5 h at 35°C and 30°C, 1 h at 25°C and 22°C, 2.5 h at 16°C and 4 h at 10°C) and used for calculation of generation time.

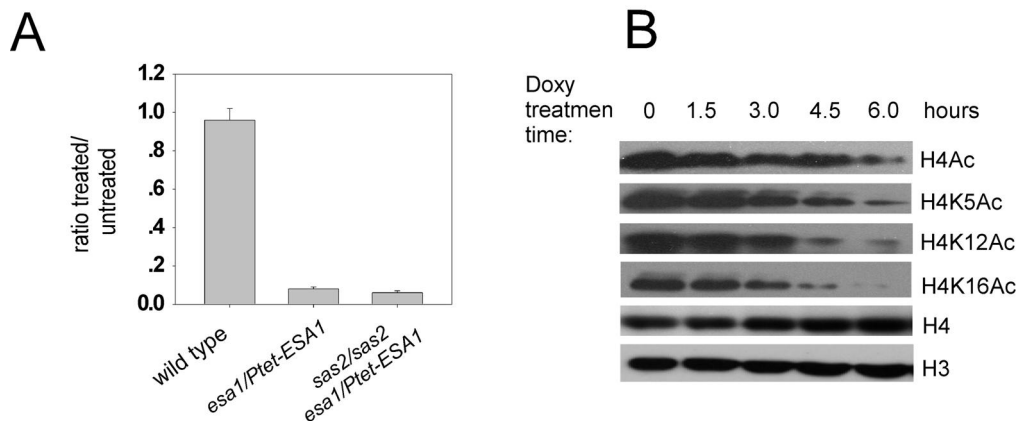

**Figure S3.** Down-regulating the expression of *ESA1* in a tet-off system. (A) Quantitative RT-PCR analyses showed that the transcriptions of *ESA1* in *esa1/Ptet-ESA1* (CWX7) and *sas2/sas2 esa1/Ptet-ESA1* (CWX8) mutants were efficiently repressed by doxycycline treatment. The cells were pretreated with 50 µg/ml doxycycline for 24 h, and re-inoculated into fresh YPD media containing 50 µg/ml doxycycline and grown for 6 h. (B) Western analyses showed that the histone H4 acetylation levels in CWX8 cells were greatly reduced by doxycycline treatment. Antibodies that specifically recognize acetylated H4 (H4Ac), H4 acetylated at lysine residues 5 (H4K5Ac), 12 (H4K12Ac), 16 (H4K16Ac), and histone H4 (H4) (Abcam).

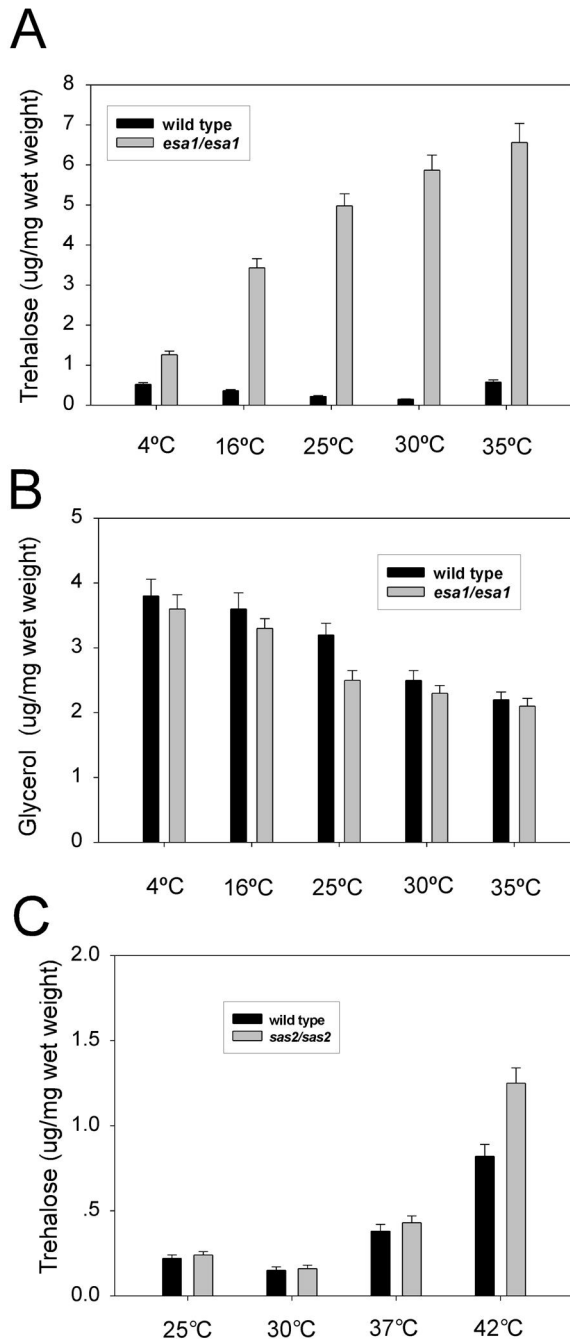**Figure S4. Determination of trehalose and**

**glycerol levels.** Trehalose (A) but not glycerol (B) was highly accumulated in *esa1/esa1* mutants. The growing cells were spread onto YPD plates and incubated at 4°C for 2 weeks, 16°C for 5 days, 25°C for 3 days, 30°C and 35°C for 2 days respectively. Cells were harvested and washed three times with ice-cold water and frozen in liquid nitrogen for assay. Trehalose level was measured by a trehalose assay kit (Sigma). Glycerol level was determined by glycerol assay kit (Abcam). About 20 mg wet weight of cells were used for each assay. Data represent means of three independent experiments. Strains are wild type (BWP17+pBES116) and *esa1/esa1* mutant (CWX3+ pBES116). (C) Trehalose concentration in *sas2/sas2* mutant (CWX6+ pBES116) cells. The growing cells were spread onto YPD plates and incubated at 25°C for 3 days, 30°C, 37°C and 42°C for 2 days respectively, and harvested for determination of trehalose levels.

1. **Backman, C. M., Y. Zhang, B. J. Hoffer, and A. C. Tomac.** 2004. Tetracycline-inducible expression systems for the generation of transgenic animals: a comparison of various inducible systems carried in a single vector. *J Neurosci Methods* **139**:257-62.
2. **Park, Y. N., and J. Morschhauser.** 2005. Tetracycline-inducible gene expression and gene deletion in *Candida albicans*. *Eukaryot Cell* **4**:1328-42.
3. **Zeidler, U., T. Lettner, C. Lassnig, M. Muller, R. Lajko, H. Hintner, M. Breitenbach, and A. Bito.** 2009. UME6 is a crucial downstream target of other transcriptional regulators of true hyphal development in *Candida albicans*. *FEMS Yeast Res* **9**:126-42.
4. **Zhu, B., G. Cai, E. O. Hall, and G. J. Freeman.** 2007. In-fusion assembly: seamless engineering of multidomain fusion proteins, modular vectors, and mutations. *Biotechniques* **43**:354-9.
